# Supplementary material for: High levels of ultraviolet radiation observed by ground-based instruments below the 2011 Arctic ozone hole
Source: Copernicus journal article supplement (doi:10.5194/acp-13-10573-2013), 2013-11-01

# Daily Erythemal Dose

Alert, Canada (83°N, 62°W)

Eureka, Canada (80°N, 86°W)

Ny-Alesund, Svalbard (79°N, 12°E)

Resolute, Canada (75°N, 95°E)

Daily Erythemal Dose

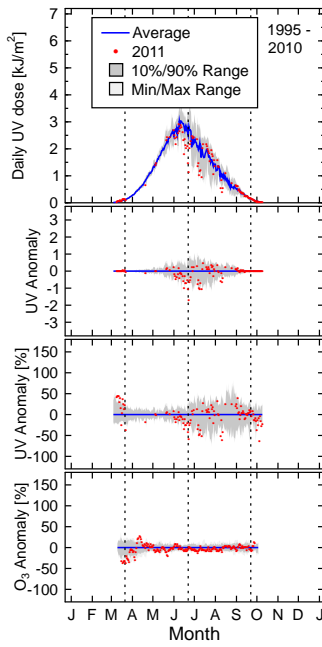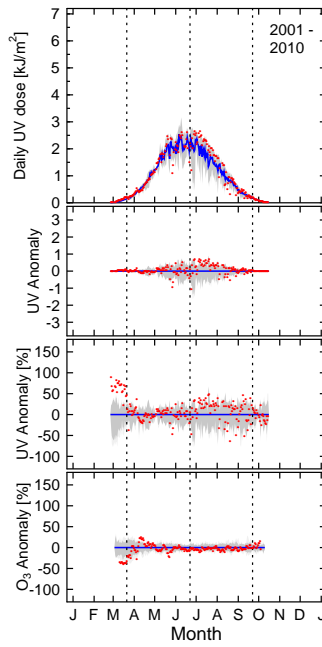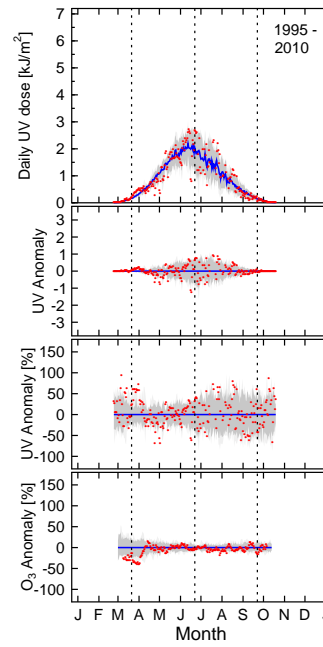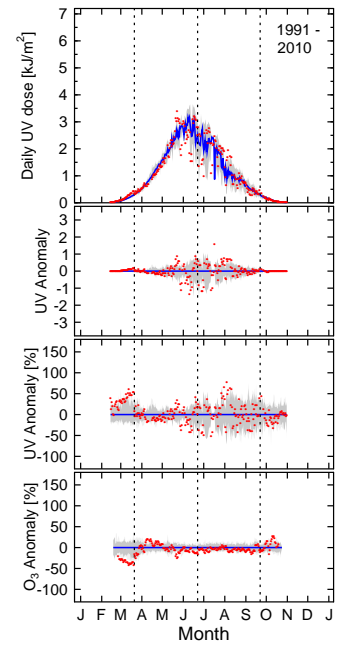

Absolute UV Anomaly

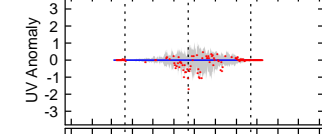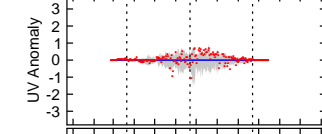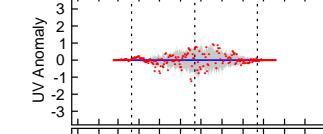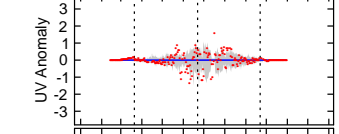

Relative UV Anomaly

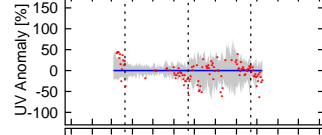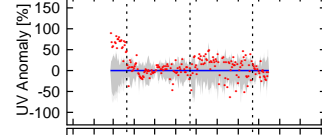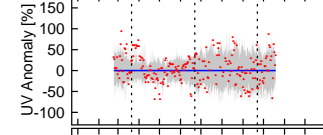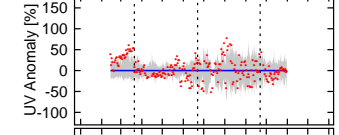

Relative Ozone Anomaly

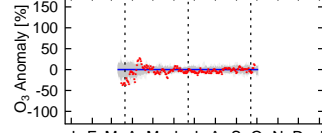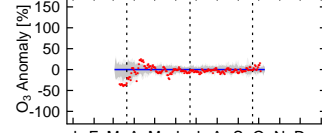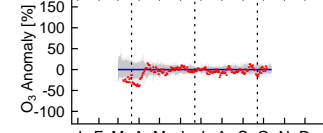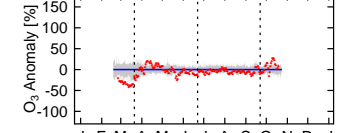

Summit, Greenland (73°N, 38°W)

Barrow, Alaska (71°N, 157°W)

Andoya, Norway (69°N, 16°E)

Sodankylä, Finland (67°N, 27°E)

Daily Erythemal Dose

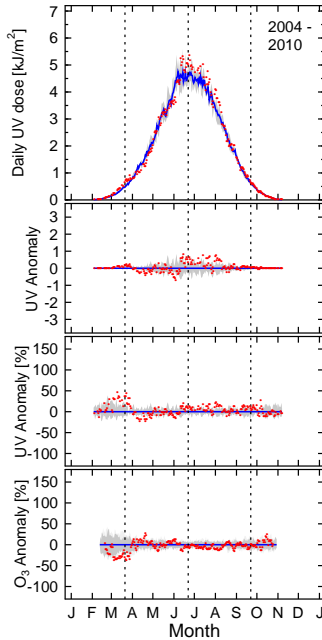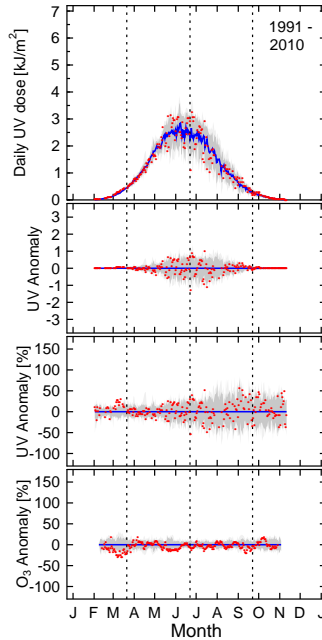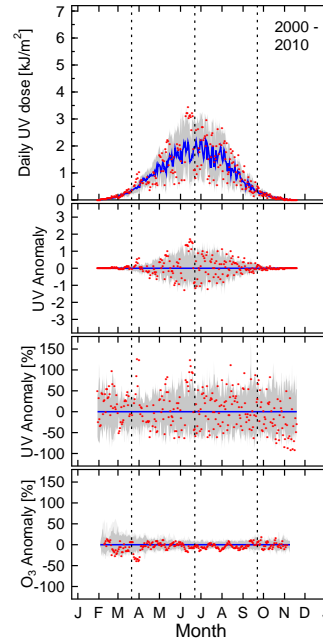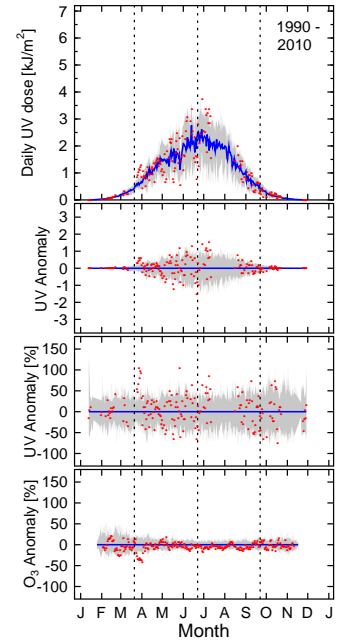

Absolute UV Anomaly

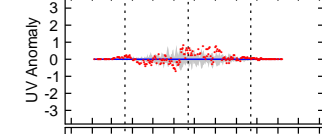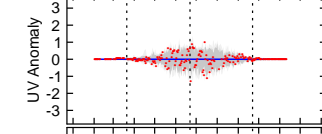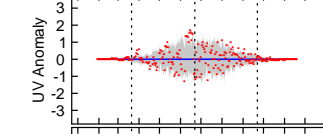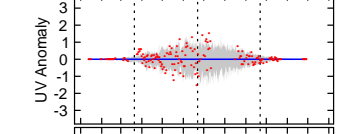

Relative UV Anomaly

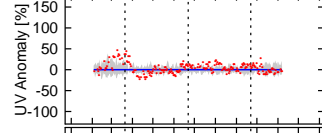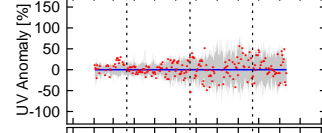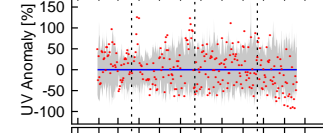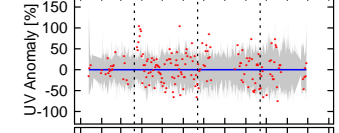

Relative Ozone Anomaly

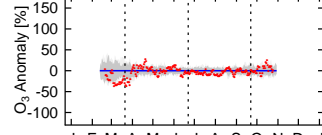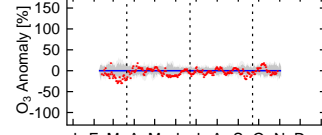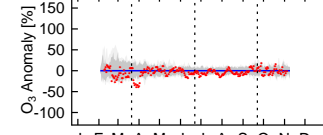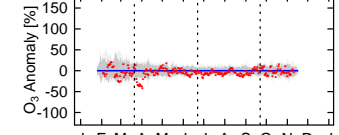

Trondheim, Norway (63°N, 10°E)

Finse, Norway (61°N, 8°E)

Jokioinen, Finland (61°N, 24°E)

Blindern, Norway (60°N, 11°E)

Daily Erythemal Dose

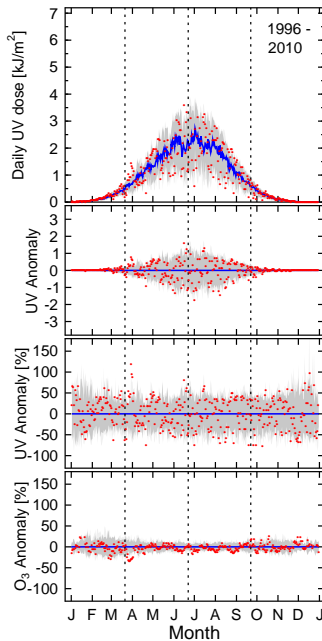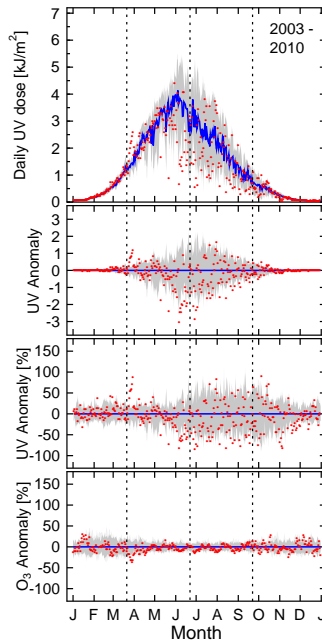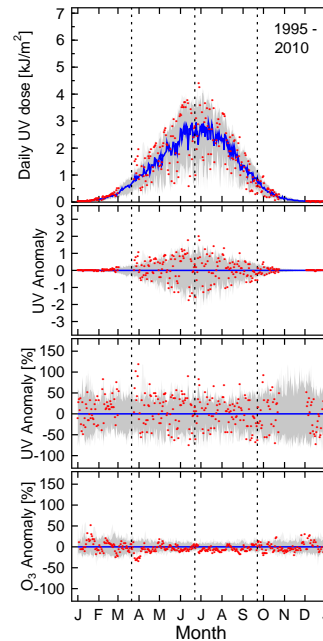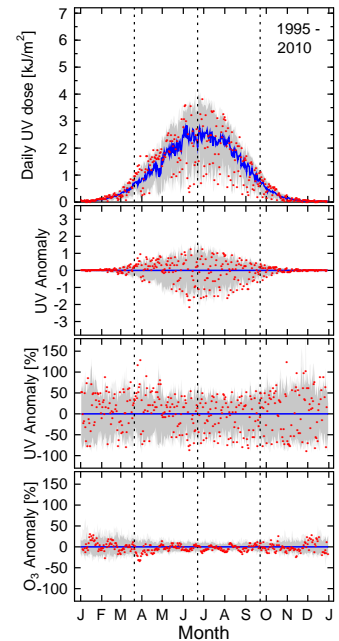

Absolute UV Anomaly

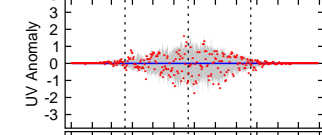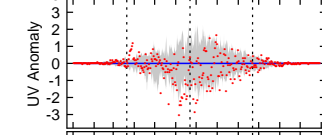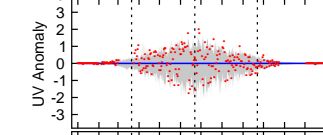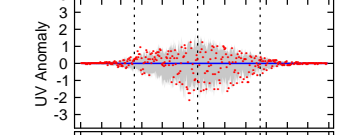

Relative UV Anomaly

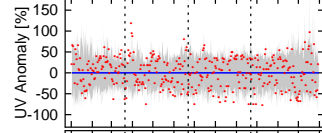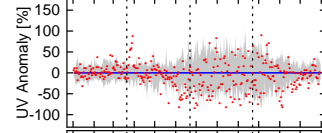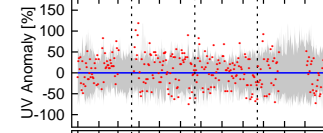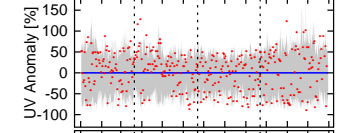

Relative Ozone Anomaly

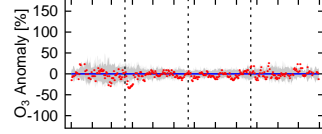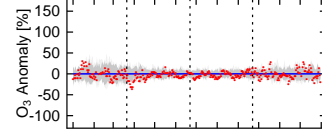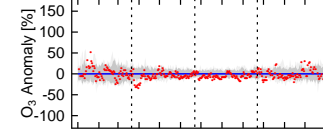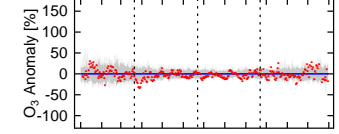

Supplement: Supplementary file 6 [file acp-13-10573-2013-supplement.zip]
