# Supplementary material for: High levels of ultraviolet radiation observed by ground-based instruments below the 2011 Arctic ozone hole
Source: Copernicus journal article supplement (doi:10.5194/acp-13-10573-2013), 2013-11-01

# Noon-time UV Index

Noon-time UV Index

Absolute UVI Anomaly

Relative UVI Anomaly

Relative Ozone Anomaly

Alert, Canada (83°N, 62°W)

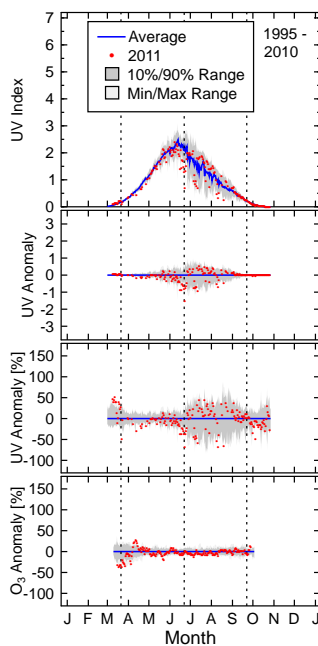

Eureka, Canada (80°N, 86°W)

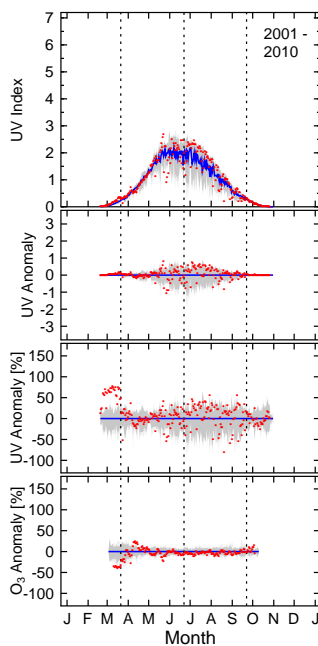

Ny-Alesund, Svalbard (79°N, 12°E)

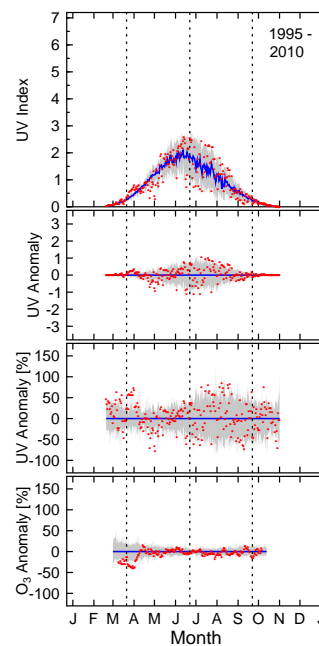

Resolute, Canada (75°N, 95°W)

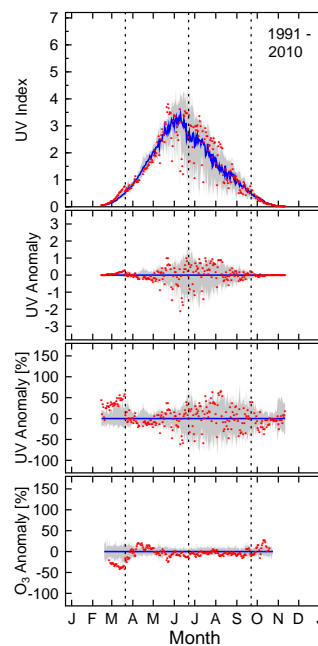

Summit, Greenland (73°N, 38°W)

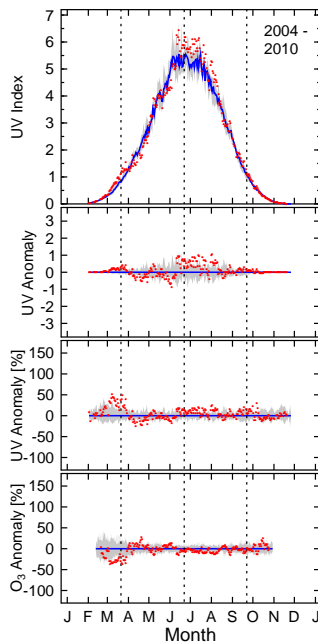

Barrow, Alaska (71°N, 157°W)

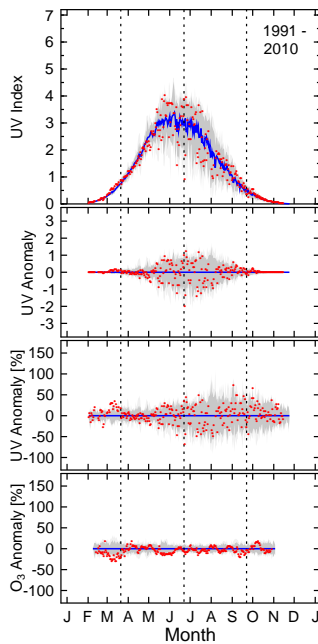

Andoya, Norway (69°N, 16°E)

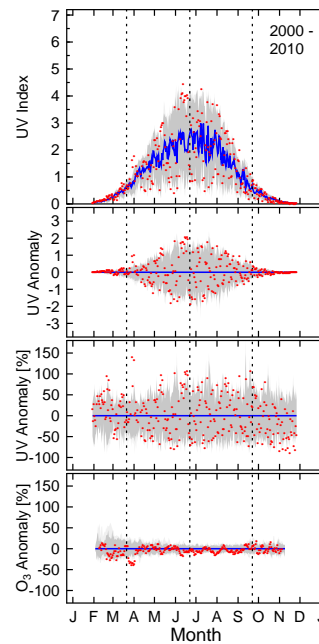

Sodankyla, Finland (67°N, 27°E)

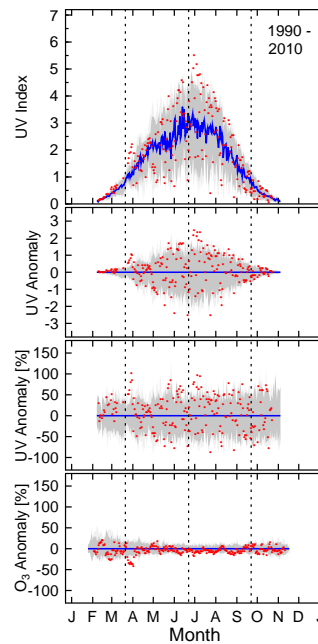

Trondheim, Norway (63°N, 10°E)

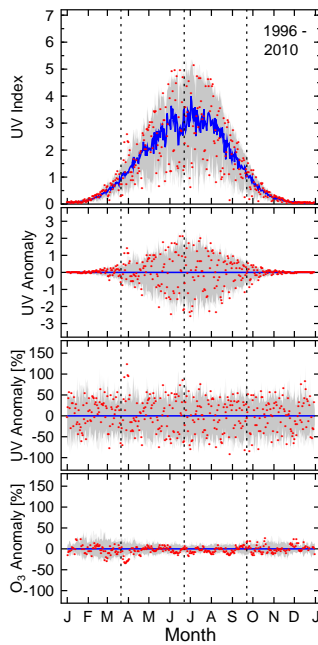

Finse, Norway (61°N, 8°E)

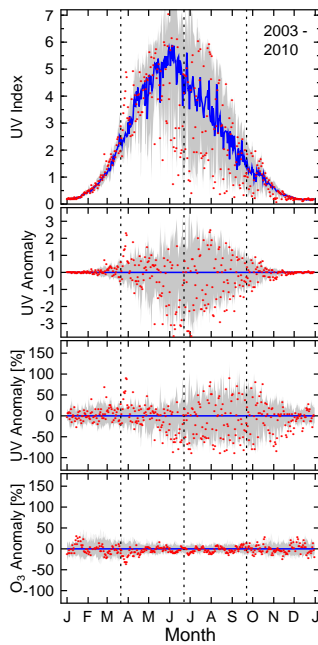

Jokioinen, Finland (61°N, 24°E)

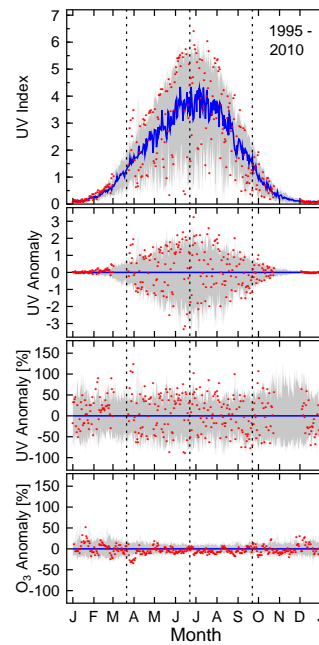

Blindern, Norway (60°N, 11°E)

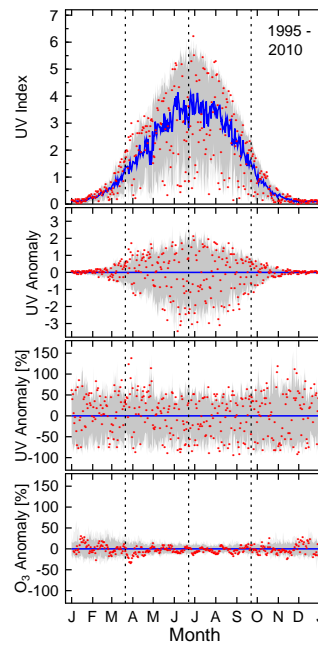

Supplement: Supplementary file 3 [file acp-13-10573-2013-supplement.zip]
